# Supplementary material for: New tools to screen wild peanut species for aflatoxin accumulation and genetic fingerprinting
Source: BMC Plant Biol. 2018 Aug 15;18:170. doi: 10.1186/s12870-018-1355-9 (PMC6094572; doi:10.1186/s12870-018-1355-9)
Supplement: Supplementary file 2 — Table S2. Primer sequences of the 288 SSRs developed in the present work. Number of alleles detected per marker, range of amplicon size, and BLAST2GO results for the sequences are also included. (XLSX 29 kb) [file 12870_2018_1355_MOESM2_ESM.xlsx]

## Sheet: Sheet1
	Moretzsohn et al., 2004
Other Name	Primer name	Primer sequences 5'-3' *(F)Forward (R)Reverse	Repeat motif	Product size (bp)	Annealing temperature
	Ah-159	(F)ATTTTGTCCCTGTGGCTTGAGG (R)AGCCAGAACCTTTCCAAACTGC	(TTG)6 imperfect	98	56
	Ah-193**	(F)CTTGCTGAAGGCAACTCCTACG (R)TCGGTTTGTCTCTTTGGTCACTC	(AAC)5 + (GA)24	445	62
	Ah-199	(F)CAATCACCTCATCTTTGGCACC (R)CCAATTACCTGTGTCCCAGTCG	(AAC)14 imperfect	153	56
	Ah-202	(F)AATTGAGGGTGCTCTTCAGCC (R)ATGAGGCTGGGGTTGAGAAGAT	(TTG)6	190	50
	Ah-208	(F)AGGGAAACCAACAAGACCAAGG (R)AGATGGTGGGTTGAGATTGGGT	(CAA)7 imperfect	146	60
	Ah-229	(F)GCAAACATCTTCCTTCCCAACA (R)ATTGACGTAAGCTGCCAAGAGG	(ACT)6 + (TCT)9 imperfect	213	60
	Moretzsohn et al., 2005
	Locus	Primer name	Primer forward (5' - 3')	Primer reverse (5' - 3')	Motif	Repeat type	Ta	K7988 x V10309a	LG	A. hypb	# locic	Scored	GenBank accession #	Blastx	E-value	Comments
	Ah1TC1A02	TC1A02	gcaatttgcacattatccga	catgttcggtttcaagtctcaa	(TC)35	PERFECT	54	P	6	P	2	3	DQ099163	At1g12930.1 68414.m01501 importin-related similar to late gestat...	2e-10
	Ah1TC1D02	TC1D02	gatccaaaatctcgccttga	gctgctctgcacaacaagaa	(TC)30	PERFECT	56	P	5	P	1	3	DQ099177	No significant hits found
	Ah1TC1E06	TC1E06	accgttacgaacgctttgtc	tccctctcatacgacaccct	(TC)21	PERFECT	56	P	3	P	2	3	DQ099165	No significant hits found		amplified many polymorphic non-specific fragments
	Ah1TC2A02	TC2A02	ctcccttgtgggtatgtggt	ggctcccattcattctcaaa	(CT)32	PERFECT	48	P	3	P	2	3	DQ099220	No significant hits found
Ah1TC2B09	Ah1TC3A12	TC3A12	gcccatatcaagctccaaaa	tagccagcgaaggactcaat	(TC)27	PERFECT	58	P	5	P	2	3	DQ099223	At4g11260.1 68417.m01822 phosphatase-related low similarity to p...	5e-19
	Ah1TC2D06	TC2D06	agggggagtcaaaggaaaga	tcacgatcccttctccttca	(AG)30	PERFECT	48	P	1	P	1	3	DQ099207	No hits found
	Ah1TC2E05	TC2E05	gaatttataaggcgtggcga	ccatcccttcttccttcaca	(GA)23	PERFECT	52	P	1	P	1	3	DQ099183	No significant hits found
	Ah1TC3B05	TC3B05	ggagaaaacgcattggaact	tttgtcccgttgggaatagt	(AG)25	PERFECT	56	P	11	P	1	3	DQ099191	No significant hits found
	Ah1TC3E02	TC3E02	tgaaagataggtttcggtgga	caaaccgaaggaggaacttg	(CT)26 + (CA)7 + (CA)5	COMPOUND	56	P	3	P	2	3	DQ099210	No hits found
	Ah1TC3H02	TC3H02	ctctccgccatccatgtaat	atggtgagctcgacgctagt	(AG)5 + (AG)25	COMPOUND	54	null V10309	1	P	1	3	DQ099184	No significant hits found
	Ah1TC4A02	TC4A02	attcaaatcggaatggcaag	gagcaaagggcgaatctatg	(GA)26	PERFECT	54	P	2	P	2	3	DQ099137	No significant hits found
	Ah1TC4E10	TC4E10	acgtcatcttccctcctcct	ccattttctcctcgaaccaa	(CCT)4 + (T)12 + (CT)14	COMPOUND	58	P	3	P	1	3	DQ099214	At1g01140.2 68414.m00019 CBL-interacting protein kinase 9 (CIPK9...	1e-18
	Ah1TC4F12	TC4F12	gatctttccgccattttctc	ggtgaatgacagatgctcca	(CT)23	PERFECT	56	null V10309	2	P	1	3	DQ099172	No significant hits found
	Ah1TC6E01	TC6E01	ctccctcgcttcctctttct	acgcattaaccacacaccaa	(GA)22	PERFECT	58	P	5	P	1	3	DQ099175	No significant hits found
	Ah1TC6G09	TC6G09	ggaggttgcatgcatcatagt	tcattgaacgtatttgaaagctc	(CT)18	PERFECT	50	P	7	P	1	3	DQ099205	No hits found
	Ah1TC6H03	TC6H03	tcacaatcagagctccaacaa	caggttcaccaggaacgagt	(AG)21	PERFECT	58	P	8	P	1	3	DQ099227	gi738938|prf||2001457F GTP-binding protein	2e-25
Ah1TC7C06	Ah2TC7C06	TC7C06	ggcaggggaataaaactactaact	ttttccttccttctcctttgtc	(GA)23	PERFECT	52	null V10309	6	P	2	3	DQ099141	No hits found
Ah1TC7E04	Ah2TC7E04	TC7E04	gaaggaccccatctattcaaa	tccgatttctctctctctctctc	(AG)16	PERFECT	58	P	3	P	2	3	DQ099143	No significant hits found
Ah1TC7G10	Ah2TC7G10	TC7G10	aatggggttcacaagagagaga	ccagccatgcactcatagaata	(GA)17	PERFECT	58	P	4	P	1	3	DQ099144	No significant hits found
Ah1TC9B08	Ah2TC9B08	TC9B08	ggttgggttgagaacaagg	accctcaccactaactccatta	(GA)22	PERFECT	56	null K7988	1	P	1	3	DQ099147	No hits found
Ah1TC9F04	Ah2TC9F04	TC9F04	cctaaacaacgacaaacactca	aagcacaacacagaaccctaaa	(TC)23	PERFECT	54	P	8	P	2	3	DQ099151	At5g08610.1 68418.m01024 DEAD box RNA helicase (RH26) strong sim...	2e-12
Ah1TC9F10	Ah2TC9F10	TC9F10	atcacaatcacagctccaacaa	ggcaagtctaatctcctttcca	(AG)31	PERFECT	60	P	8	P	2	3	DQ099152	gi738938|prf||2001457F GTP-binding protein	2e-25
Ah1TC11A02	Ah2TC11A02	TC11A02	aatcggaatggcaagagaca	agagcaaagggcgaatctatg	(AG)19	PERFECT	58	P	2	P	2	3	DQ099155	No significant hits found
Ah1TC11A04	Ah2TC11A04	TC11A04	actctgcatggatggctacag	catgttcggtttcaagtctcaa	(CT)16 + (CT)33	COMPOUND	52	P	6	P	2	3	DQ099236	At1g12930.1 68414.m01501 importin-related similar to late gestat...	1e-11
	gi-30419832	gi-832	gccactttattctaagcactcc	aagagaccacacgctcaca	(ATT)10	PERFECT	56	P	4	P	1	3		gi|228682|prf||1808316A metallothionein-like protein	3e-20
	gi-951107	gi-1107	gatacatctcatccgttcgtg	ccgtccgaccacatacaa	(AAC)4 + (CA)5 + (AT)18	COMPOUND	56	P	9	P	1	3		gi|951108|gb|AAA74571.1| galactose-binding lectin precursor	e-118
	gi-30419906	gi-906	acatcaaaacgggaaaacga	caaacctctacgaccactaccg	(TC)6 + (TAT)6	COMPOUND	54	P	6	M	1	3		gi|11612197|gb|AAG37451.1| seed maturation protein LEA 4 [Glycin...	9e-34
	AS1RN2H11	RN2H11	agtagcccaaggtgccaag	gtgctcaaatacatgacggttc	(CAA)4 + (TCT)4 + (TA)6	COMPOUND	62	P	8	M	2	3	DQ099058	gi|6688818|emb|CAB65284.1| putative wound-induced protein [Medic...	1e-10
	gi-30419560	gi-560	ggtggaggattttggtgaata	gcaagaaagcatagtagttagcagtc	(ACA)5 + (TCA)4	COMPOUND	56	P	3	M	1	3		At1g69760.1 68414.m08027 expressed protein	6e-10
	gi-30419449	gi-449	cttctacggtgatgttcccttc	attggaggtggctttggttt	(CAA)5	PERFECT	58	M	-	M	1	3		At2g20260.1 68415.m02367 photosystem I reaction center subunit I...	9e-25
	Ah1TC1A08	TC1A08	aaggggttaagggcatgact	ccacaaatgggtcgtcgat	(AG)30	PERFECT	58	P	6	M	2	3	DQ099213	No hits found
	Ah1TC1B02	TC1B02	aacatgcatgcaaatggaaa	gccaaagtcacttgtttgctt	(CT)25	PERFECT	52	P	2 and 5	M	2	2	DQ099199	No significant hits found
	Ah1TC1D01	TC1D01	tgccaatctcctcttcaacc	tcaggcaagggttcctactg	(GA)24	PERFECT	64	P	1 and 7	M	2	3	DQ099190	At4g11980.1 68417.m01907 MutT/nudix family protein low similarit...	1e-13
	Ah1TC1E01	TC1E01	cagcaaagagtcgtcagtcg	gaaagttcacttgagcaaattca	(GA)29	PERFECT	48	M	-	P	1	3	DQ099178	No hits found
	AS1RI1F06	RI1F06	tgtctctcttcctttccttgct	ccttttgcttctttgcttcc	(ATA)6 + (ATT)4 + (GA)6	COMPOUND	56	P	2	P	1	3	DQ099041	At5g02020.1 68418.m00121 expressed protein	3e-10
	AS1RN3E10	RN3E10	tagaagaaggagagggtgagaa	ctaagatggtggtgggaatta	(GAC)6	PERFECT	58	P	3	P	1	3	DQ099059	At1g06475.1 68414.m00687 expressed protein	2e-08
	gi-30419385	gi-385	acacaaagcaccatattttactcct	actccgaattaaagcgaattga	(AG)8 + (GCAT)3	COMPOUND	52	P	unlinked	P	2	3		gi|28194653|gb|AAO33588.1|AF479306_1 putative extensin/nodulin p...	6e-24
	AS1RN2C06	RN2C06	cccatgcctcatttggatt	gagagcggtggaggtagaaac	(ACC)5	PERFECT	58	M	-	M	2	3	DQ099056	No significant hits found
	AS1RN2F12	RN2F12	accgcaaccaccacaatc	gcgagaaggcgagaaacat	(GAA)5	PERFECT	56	P	2	M	1	3	DQ099057	No hits found
	AS1RN3B12	RN3B12	gctccttcgccactatcg	tacggtttcttctctcgcatc	(CTT)5	PERFECT	52	M	-	M	2	3	DQ099054	At5g48760.1 68418.m06034 60S ribosomal protein L13A (RPL13aD)	e-107
	AS1RN5C02	RN5C02	ttcttcctcttttctccttc	acatctcatcatcaatcacata	(TCA)6 + (TTC)4	COMPOUND	52	M	-	M	1	3	DQ099060	No significant hits found
	Moretzsohn et al., 2005: Ferguson et. al., 2004
	Locus	Primer name	Primer forward (5' - 3')	Primer reverse (5' - 3')	Motif	Repeat type	Ta	K7988 x V10309a	LG	A. hypb	# locic	Scored	GenBank accession #	Blastx	E-value	Comments
	pPGSSeq12B2	Seq12B02	aattccccaacctctttgtt	aattgttgttgtcttcgatcatac	(TA)6 + (CT)8	COMPOUND	52	P	1	M	2	2		No hits found
	pPGPSeq4C1	Seq4C01	cgataacaacgagaagggtga	aagtaaagcgaaacgcacca	(TG)7 + (GA)5	COMPOUND	52	P	1	-	-	-		No significant hits found
	pPGPSeq2H6	Seq2H06	tctctcctgctcggcgtga	ccgtcgctgccttctcgt	(TC)7 + (CT)6	COMPOUND	56	-	-	M	2	3		No significant hits found
	Proite et al., 2007
	Clone name	Primer/Locus name	Primer forward (5' - 3')	Primer reverse (5' - 3')	Motif	Repeat type	Ta	K7988 x V10309 (a)	LG	A. hyp (b)	# loci (c)	Score (d)	Top hit Blastx	E-value	Comment
	AS2RM13A12	RM13A12	tggtgaagaacggagttattag	cgagattaggtatgtattgactttc	(TTA)20	PERFECT	52	P	9	P	2	3	At3g62150.1 68416.m06983 multidrug resistant (MDR) ABC transport...	3e-23
	AS1RN25D11	RN25D11	gggcacccaagatgtgga	ggcgacttcgagatagtggtct	(GCC)5	PERFECT	52	M		M	1	1	At4g32610.1 68417.m04643 mitochondrial glycoprotein family prote...	4e-61
RN31E06	AS1RN31E06	RN31E6	agggacagcatttccaagatga	aggcggccgacatgtttt	(TAT)6	PERFECT	52	M		-	-	-	No significant hits found
RN34G06	AS1RN34G06	RN34G6	aaggtcagaaagtggaaagcac	ataaagaatgaggcgttcatgg	(AG)7	PERFECT	52	-		-	-	-	No significant hits found
RN36A01	AS1RN36A01	RN36A1	gcactagcaataccaacaccaa	ctcttaacacaatctgccacca	(AGT)6	PERFECT	52	M	-	P	2	2	At5g05360.1 68418.m00578 expressed protein similar to unknown pr...	1e-07
RM14G02	AS1RM14G02	RM14G2	gctttaccagacacagcaattc	ctagcaataacagcatgaaccg	(GAT)6	PERFECT	52	M	-	M	-	1	No hits found
RM15H08	AS1RM15H08	RM15H8	atctaacaacaaaacgacaccg	caggggtgtaagtgcagtgtaa	(TC)6 + (CAG)6	COMPOUND	52	P	10	M	1	2	No hits found
RM6E08	AS1RM6E08	RM6E8	attttcatttgtggggtgctac	ggctgaggagataagggagaat	(CTTC)6	PERFECT	52	P	5				At1g60010.1 68414.m06761 expressed protein	6e-28
	AS2RM14E11	RM14E11	ccatccaatcagcaatcactaa	gaagaagaagaggaatgccaga	(GA)7	PERFECT	52	M		M	1	2	At3g15760.1 68416.m01996 expressed protein	1e-12
	AS2RM15E12	RM15E12	cactattccttggtggagaagg	tttctaatacatcggtgggaca	(TA)6	PERFECT	52	M	-	-	-	-	At5g48150.1 68418.m05947 phytochrome A signal transduction 1 (PA...	9e-75
RM15C02	AS1RM15C02	RM15C2	aaaatgcgctcccttcac	tgtacggcaattctctggagt	(TC)8	PERFECT	52	-	-	-	-	-	At5g45550.1 68418.m05594 mob1/phocein family protein contains Pf...	e-114
	AS1RM15C11	RM15C11	ggactgaacatccggcac	ggaccaaatgactgctctctct	(TCA)11	PERFECT	52	P	8	M	1	2	At5g25350.1 68418.m03007 F-box family protein contains Pfam PF00...	2e-06
RM11H06	AS1RM11H06	RM11H6	tcaagggtccactaataagacca	tgcaactgataaggaagctgaa	(TAA)6	PERFECT	52	P	unlinked	M	1	1	At1g70260.1 68414.m08083 nodulin MtN21 family protein contains s...	1e-43
RN40D08	AS1RN40D08	RN40D8	gctggccttcttctttcagat	taccagtgtttcatccaagtcg	(CT)6	PERFECT	52	-	-	-	-	-	At3g55960.1 68416.m06218 NLI interacting factor (NIF) family pro...	2e-36
	Leal Bertioli et al., 2009
	Marker name short	Redundancy/alternative name	Sequence of marker	Genbank ref	Marker Type - 1	Marker Type -2	Primer fwd	Primer rev	SNaPshot primer (lower case bases are tail)	SNP	Marker Info
	AHBGSI1001D05-1		gcccgggcaggtaccgtttacaataaacgaaattctaataaaaacaattgaacaagaacacgtcaacaccaccacgcaagaaactcaatacattcctcaacaaactccgacattcatttcaacccgctctctagtatcaaatctattttgctgaagcaagaaggctttcatagcgacctttgaagaaggccaaaattgggtctctaggaggcaaacactctttgatagttggttgactcagaaattcttgactccatttgtagagtttgggaaacttctcattagtgaacagttgaagacctgcaatttcttgaatcagaggcacccaaaacgcaatgtatacagcggcaatgtccacaaggccaaattcctctcctccaaagaacttgcctttaagct…	EL966988	SNP	EST	AACAAGAACACGTCAACACCA	GCGGCATGGAAATCTGTT	gactgactgactgactgacCACACGAGGCTCTTCA	A/G
	AHBGSI1001D05-2		gcccgggcaggtaccgtttacaataaacgaaattctaataaaaacaattgaacaagaacacgtcaacaccaccacgcaagaaactcaatacattcctcaacaaactccgacattcatttcaacccgctctctagtatcaaatctattttgctgaagcaagaaggctttcatagcgacctttgaagaaggccaaaattgggtctctaggaggcaaacactctttgatagttggttgactcagaaattcttgactccatttgtagagtttgggaaacttctcattagtgaacagttgaagacctgcaatttcttgaatcagaggcacccaaaacgcaatgtatacagcggcaatgtccacaaggccaaattcctctcctccaaagaacttgcctttaagct…	EL966988	Size polymorphic	EST	TTGAAGAGCCTCGTGTGTTT	GGCCAAGTTCATAGATGACAA
	AHBGSI1002B03		tacctataatgattgcagttttgtttacagggatatagaactaaaagtttgaacgtgtatagcagataaattgtagtaataacaagagtaataagtcaatgactagttagcttactgatttttggaggtccaaccagaatgagcagcaacttctgttagcgcatctctccatcttttgatcttctcacggttatatctctgttcgtgtttcttgaaagcttcatgaaaggttcctatttggtgcctcacatcacaaggctccacatcgtagaacacgggcacgatctgttgtcccaccttgttgttgcactccatgattttttggagctcatccaagcaccaactggaggaagcgtagtccggtgagaaaacaataactgcaaacatcgactcttcaat…	EL966749	SNP	EST	GATTGCAGTTTTGTTTACAGG	GCAAAGGCGATGTTATTTC	gactgactgactgactgactgaGGTTGGACCTCCAAAAAT	C/G
	AS2RM8B10		tttcgcattataataaagacaaaggaaaaagaaaactgtaaggaggtaccctttaaaatgcaagccagacaagttagctgcgtcagccatggcagtcctccatctttgcactctgtccatggcatgctcaaacgtccttccagtcttagccagtgcctcctcataaatacctttctgatgccgcacgacgctaggatcgacgccgtaaaacactggcaaaacaaactggccatgacgctgagagcactccatgatcttcactagttcgtttaggcaataagaagattcagcatagttcttagagaacacaagaatcgcaatcctggacgcttcaattgccttcataagtgatgcggagatttcattccctctgtgaatatcgtcaaaatccatgaaggc…	EH047622	SNP	EST	TCCTTCTAAGCTCTCATGGGTC	GCCAGTGCCTCCTCATAAATAC	gactgactgactCTATCTCTACAAAGCTCT	C/T
	AS1RN32E12		tcaccagaagtcccagttgagtggggttacccttttcttggattaaaaactatggaggtggaaggttgtgactttttaacaaatgcagttctcccatctcatttacttcctcttctaagtaatttggaacagctgcaagtgagtaaatgtaaacatgttgaggcaatatttgacgtgaaagatacatcagcaaaacatgatgatcctgttacatttcgcctgagtaaagtcattttgaaggagcttccaaccctgacgcatgtttggaacaatgatcccaaagcaagtctcttcaactttccatttctggaggcagttagtgttgatgaatgtaaaggaataaaaagtctatttccagcatcagttcccaaagataacctaaagcaattagttgttaga…	EH043276	SNP	EST	ACTATGGAGGTGGAAGGTTGTG	CAGAATGGTCAATATGGGGAAC	gactgacGGAGTTAGAGGAGATTGT	T/C
	AHBGSI1002D05		gcccgggcaggtaccattactgcttctggcgatctgattcctctctcctacattgctgcattgctaactggccgtcgttttacataagccctcgtatcctcaggagagtcccttgatgcaaacgaagctttccatttagcagggctgcattctgggttctttgagctgaaacccaaagaaggacttgccctcgtaaatggcactgccgtggggtctagtgtagcttctgtggtgctctttgaggcaaacatcttagctttattgtctgaaattttgtcagcagttttcaccgaagttatgcaggggaatccagaatttacacatcatttgatacataagctgaagt	EL966766	SNP	EST	CCATTACTGCTTCTGGCGATC	AAATTCTGGATTCCCCTGCA	gactgactgactgacACTAGACCCCACGGC	A/G
	AHBGSI1001A06		gcccgggcaggtacttgacctcctagactgttagaagaaagtctaaaaaaatttaatttagtgaagttgttaaacacatctgggatgtgaccactgaaagtattatcactaagatctaagtaggtgagatgtttgaggtttgaaagcaaagatggaatctcaccatgaagtctatttcctgaaaggtccaaatgagttagttgagtgaggttccacaaagacacaggatttaatccatcaaattggcaatactctagccttagttggttaagagacttcaggtggcctatggaatcaggtatttctcctgagaaagctgtgttagagagatccaagatcgttagaggactgctccaattggactctggaagttcacctttcagctcttcattgtcattc…	EL966965	SNP	EST	TCTGGGATGTGACCACTGA	TCATCCTCTTTGTTGATCCTG	gactgactgactgactgactTAAATGAGTTAGTTGAGTGA	A/G
	AHBGST1002C10		gtaactcctcttgtgatattgcaaaatgcttttagctgctttctttcattttctctgttgactgaatgcttgatttcacagatcaattacttcccttcaaggtatgatcctgttcgtcatgcagaaaaggtccccattccttctgttattctcaatggaaggcgtgagaaggtatgttctgatggatttcttatcgtgaatgtgaatacttcatatttaaatgtcttccaacttgaaatcagttatatttcttagttgccaataaagttaggccaaagttaatatgaaaggtagttgatttatttaaaaagaagaaagaacccctcaaaatgtctcctttattgatcaacaatgtgtaagcaactctacttcttaatgcagaccataattgagaaggag…		SNP	EST	GGCAGGTACATGTGTAACTCCTCT	CGGTGCAAAAGAACGGTATC	gactgactgactgactgactgATTCAGTCAACAGAGAAAA	A/T
	AHBGSI1004D05		acaaatccaccatcttccgcgccaacatgccacctggccccttcgtcgcctccgatccaaaggtcatcgtcctcctcgacggaaaaagcttccctgttctcttcgaccttaccaaagtagagaagaaggacctcttcaccggaacttacatgccctccaccaatctcactggaggctaccgcatcctctcctacctcgacccttccgaaccaaagcacgagaagctcaagcacctcatcttcttcctcctcaagtccagaagcaacaacatcatccctcagttccattcaaactacactgatctctttgattccctggacagagaactttccaagaacggcaaagcaagtttctccggcaacgaccaaacggcgtttacgtttctttgccgcgcttttt…	EL966851	SNP	EST	CCGAGGTACAAATCCACCATC	AGGCTCGTGTCTTTGGGATC	gactgactgactgactCAGTTCCATTCAAACTACA	A/C
	Liu et al., 2015
	InDels Primer	Sequence from 5′ to 3′	Contig	Annotation	bp difference	Location
	Indel-003_F	GGCCCATGACAAAAGGACTA	[0031]	Peroxidase	6 bp	3′ non-coding
	Indel-003_R	GAACTGTGACTGCCACGCAC
	Indel-004_F	GCCTGTAACTGCCTCAAAGC	[0038]	LTP	18 bp	3′ non-coding
	Indel-004_R	CATACAAAGACTACAAGAGGARAGG
	Indel-005_F	CAAGCCAGGCTATTGACTCC	[0041]	Isoprene synthase	3 bp	Coding
	Indel-005_R	TCGTGAAATGACCATCATTG
	Indel-007_F	ACCGTGCTGTGACAAATTCA	[0047]	Hyoscyamine-6-dioxygenase	22 bp	3′ non-coding
	Indel-007_R	GCACCTCTACATGAAGGTGAAC
	Indel-016_F	TCCTCATCAGGAACTGGGATA	[0160]	Alkaline alpha galactosidase	19 bp	3′ non-coding
	Indel-016_R	TGCAGCAATAGGACTTCTGG
	Indel-017_F	GTGGAGGAGTGTACGGAGGA	[0137]	Drought induced protein	7 bp	3′ non-coding
	Indel-017_R	CACACAAGAATGAAAGTGTAAAACC
	Indel-018_F	AGCTGGAAAGCAAGAGCAAG	[0177]	Arachin Ahy-3	12 bp	Coding
	Indel-018_R	GCTGTTTGCGTTCATGTTGT
	Indel-020_F	CATTTTCAAACATTACACTCACTCATC	[0294]	Plant lipid transfer protein	5 bp	3′ non-coding
	Indel-020_R	CAACACATGCAATGCAACAA
	Indel-030_F	TTGAAGGCAGAGGAGGTAGC	[0522]	Remorin	11 bp	3′ non-coding
	Indel-030_R	GAAAGGAACATTGAACTAAATTTTGC
	Indel-032_F	AGGAGCAACCGGACACATAC	[0628]	Electron transporter/metal ion	7 bp	3′ non-coding
	Indel-032_R	TGCACCTCATCAACCTCTCA
	Indel-042_F	GGGATTGAGCATGAACGATT	[3863]	Dihydroxy-acid dehydratase	2 bp	3′ non-coding
	Indel-042_R	GATAACAAATGGGGGCAAGA
	Indel-046_F	TGAACTCGAGCGAACATCAC	[1585]	Ran GTPase binding	24 bp	Coding
	Indel-046_R	TTTGTGCTTTGGCACCATTA
